# Supplementary material for: Reported Dietary Intake and Food Sources of Zinc, Selenium, and Vitamins A, E and C in the Spanish Population: Findings from the ANIBES Study
Source: MDPI journal article supplement (doi:10.3390/nu9070697), 2017-07-06
Supplement: s1 [file s1]

**Table S1. Daily zinc intake and distribution by sex and age group in the ANIBES Study population.**

| <b>ZINC (mg/d)</b>             | <b><i>n</i></b> | <b>Mean</b> | <b>SD</b>  | <b>SEM</b> | <b>P5</b>  | <b>P25</b>  | <b>P50<br/>Median</b> | <b>P75</b> | <b>P95</b>  | <b>Minimum</b> | <b>Maximum</b> |
|--------------------------------|-----------------|-------------|------------|------------|------------|-------------|-----------------------|------------|-------------|----------------|----------------|
| <b>Total</b>                   | <b>2009</b>     | <b>8.1</b>  | <b>2.6</b> | <b>0.1</b> | <b>4.6</b> | <b>6.3</b>  | <b>7.7</b>            | <b>9.5</b> | <b>12.9</b> | <b>2.3</b>     | <b>27.3</b>    |
| Men                            | 1013            | 8.8         | 2.9        | 0.1        | 4.9        | 6.8         | 8.4                   | 10.4       | 13.9        | 2.3            | 27.3           |
| Women                          | 996             | 7.4         | 2.2        | 0.1        | 4.4        | 5.9         | 7.2                   | 8.5        | 11.2        | 2.9            | 19.5           |
| <b>Children 9–12 years</b>     | <b>213</b>      | <b>8.3</b>  | <b>2.1</b> | <b>0.1</b> | <b>3.7</b> | <b>17.3</b> | <b>8.2</b>            | <b>4.8</b> | <b>6.7</b>  | <b>9.6</b>     | <b>12.2</b>    |
| Men                            | 126             | 8.6         | 2.2        | 0.2        | 3.7        | 17.3        | 8.2                   | 5.3        | 7.3         | 9.9            | 12.6           |
| Women                          | 87              | 7.8         | 2.0        | 0.2        | 4.3        | 12.5        | 7.6                   | 4.7        | 6.2         | 9.3            | 11.4           |
| <b>Adolescents 13–17 years</b> | <b>211</b>      | <b>8.6</b>  | <b>2.6</b> | <b>0.2</b> | <b>2.9</b> | <b>18.6</b> | <b>8.3</b>            | <b>4.9</b> | <b>6.8</b>  | <b>10.0</b>    | <b>13.2</b>    |
| Men                            | 137             | 9.2         | 2.6        | 0.2        | 2.9        | 18.6        | 8.7                   | 5.5        | 7.5         | 10.9           | 13.8           |
| Women                          | 74              | 7.4         | 2.3        | 0.3        | 3.6        | 13.5        | 7.5                   | 3.7        | 5.8         | 8.8            | 12.8           |
| <b>Adults 18–64 years</b>      | <b>1655</b>     | <b>8.2</b>  | <b>2.7</b> | <b>0.1</b> | <b>2.3</b> | <b>27.3</b> | <b>7.7</b>            | <b>4.7</b> | <b>6.3</b>  | <b>9.7</b>     | <b>13.0</b>    |
| Men                            | 798             | 8.9         | 2.9        | 0.1        | 2.3        | 27.3        | 8.6                   | 4.9        | 6.8         | 10.5           | 14.4           |
| Women                          | 857             | 7.5         | 2.2        | 0.1        | 2.9        | 19.5        | 7.2                   | 4.4        | 5.9         | 8.6            | 11.4           |
| <b>Elderly 65–75 years</b>     | <b>206</b>      | <b>7.4</b>  | <b>2.4</b> | <b>0.2</b> | <b>3.1</b> | <b>20.0</b> | <b>7.1</b>            | <b>4.3</b> | <b>5.7</b>  | <b>8.5</b>     | <b>11.2</b>    |
| Men                            | 99              | 8.1         | 2.7        | 0.3        | 3.7        | 20.0        | 7.5                   | 4.8        | 6.2         | 9.5            | 13.4           |
| Women                          | 107             | 6.8         | 1.9        | 0.2        | 3.1        | 12.3        | 6.8                   | 3.9        | 5.4         | 7.8            | 10.5           |

**Table S2. Daily selenium intake and distribution by sex and age group in the ANIBES Study population.**

| <b>SELENIUM<br/>(mg/d)</b>     | <b><i>n</i></b> | <b>Mean</b> | <b>SD</b> | <b>SEM</b> | <b>P5</b> | <b>P25</b> | <b>P50<br/>Median</b> | <b>P75</b> | <b>P95</b> | <b>Minimum</b> | <b>Maximum</b> |
|--------------------------------|-----------------|-------------|-----------|------------|-----------|------------|-----------------------|------------|------------|----------------|----------------|
| <b>Total</b>                   | <b>2009</b>     | 75          | 28        | 1          | 36        | 55         | 72                    | 91         | 127        | 14             | 265            |
| Men                            | 1013            | 81          | 29        | 1          | 42        | 61         | 77                    | 100        | 136        | 20             | 188            |
| Women                          | 996             | 69          | 26        | 1          | 33        | 51         | 67                    | 84         | 112        | 14             | 265            |
| <b>Children 9–12 years</b>     | <b>213</b>      | <b>77</b>   | <b>25</b> | <b>2</b>   | <b>37</b> | <b>59</b>  | <b>76</b>             | <b>92</b>  | <b>122</b> | <b>9</b>       | <b>180</b>     |
| Men                            | 126             | 79          | 27        | 2          | 39        | 59         | 76                    | 96         | 128        | 9              | 180            |
| Women                          | 87              | 74          | 23        | 2          | 37        | 57         | 75                    | 91         | 107        | 24             | 140            |
| <b>Adolescents 13–17 years</b> | <b>211</b>      | <b>80</b>   | <b>29</b> | <b>2</b>   | <b>38</b> | <b>58</b>  | <b>77</b>             | <b>98</b>  | <b>135</b> | <b>26</b>      | <b>164</b>     |
| Men                            | 137             | 85          | 29        | 2          | 40        | 64         | 81                    | 107        | 136        | 26             | 164            |
| Women                          | 74              | 71          | 27        | 3          | 34        | 52         | 67                    | 86         | 131        | 30             | 150            |
| <b>Adults 18–64 years</b>      | <b>1655</b>     | <b>76</b>   | <b>28</b> | <b>1</b>   | <b>36</b> | <b>55</b>  | <b>72</b>             | <b>92</b>  | <b>127</b> | <b>14</b>      | <b>265</b>     |
| Men                            | 798             | 82          | 29        | 1          | 42        | 62         | 79                    | 101        | 137        | 20             | 198            |
| Women                          | 857             | 70          | 26        | 1          | 33        | 51         | 67                    | 85         | 114        | 14             | 265            |
| <b>Elderly 65–75 years</b>     | <b>206</b>      | <b>70</b>   | <b>28</b> | <b>2</b>   | <b>34</b> | <b>51</b>  | <b>65</b>             | <b>83</b>  | <b>117</b> | <b>23</b>      | <b>221</b>     |
| Men                            | 99              | 75          | 30        | 3          | 41        | 58         | 70                    | 86         | 124        | 28             | 221            |
| Women                          | 107             | 64          | 24        | 2          | 31        | 46         | 61                    | 80         | 109        | 23             | 144            |

**Table S3. Daily vitamin A intake and distribution by sex and age group in the ANIBES Study population.**

| <b>VITAMIN A<br/>(µg RE/d)</b> | <b><i>n</i></b> | <b>Mean</b> | <b>SD</b>  | <b>SEM</b> | <b>P5</b>  | <b>P25</b> | <b>P50<br/>Median</b> | <b>P75</b> | <b>P95</b>  | <b>Minimum</b> | <b>Maximum</b> |
|--------------------------------|-----------------|-------------|------------|------------|------------|------------|-----------------------|------------|-------------|----------------|----------------|
| <b>Total</b>                   | <b>2009</b>     | <b>668</b>  | <b>850</b> | <b>19</b>  | <b>158</b> | <b>318</b> | <b>477</b>            | <b>707</b> | <b>1646</b> | <b>2</b>       | <b>11017</b>   |
| Men                            | 1013            | 691         | 934        | 29         | 171        | 320        | 478                   | 707        | 1731        | 38             | 11017          |
| Women                          | 996             | 644         | 754        | 24         | 151        | 315        | 474                   | 705        | 1509        | 2              | 7505           |
| <b>Children 9–12 years</b>     | <b>213</b>      | <b>664</b>  | <b>632</b> | <b>43</b>  | <b>164</b> | <b>326</b> | <b>496</b>            | <b>759</b> | <b>1914</b> | <b>79</b>      | <b>5991</b>    |
| Men                            | 126             | 702         | 577        | 51         | 164        | 326        | 531                   | 883        | 1965        | 79             | 3196           |
| Women                          | 87              | 609         | 703        | 75         | 164        | 305        | 427                   | 656        | 1079        | 120            | 5991           |
| <b>Adolescents 13–17 years</b> | <b>211</b>      | <b>570</b>  | <b>475</b> | <b>33</b>  | <b>165</b> | <b>309</b> | <b>426</b>            | <b>687</b> | <b>1446</b> | <b>108</b>     | <b>3434</b>    |
| Men                            | 137             | 582         | 488        | 42         | 165        | 319        | 446                   | 718        | 1449        | 109            | 3434           |
| Women                          | 74              | 546         | 452        | 53         | 164        | 298        | 383                   | 651        | 1433        | 108            | 2831           |
| <b>Adults 18–64 years</b>      | <b>1655</b>     | <b>672</b>  | <b>866</b> | <b>21</b>  | <b>159</b> | <b>320</b> | <b>479</b>            | <b>710</b> | <b>1605</b> | <b>2</b>       | <b>11017</b>   |
| Men                            | 798             | 697         | 958        | 34         | 173        | 324        | 484                   | 707        | 1663        | 38             | 11017          |
| Women                          | 857             | 650         | 770        | 26         | 147        | 315        | 474                   | 714        | 1593        | 2              | 7505           |
| <b>Elderly 65–75 years</b>     | <b>206</b>      | <b>658</b>  | <b>872</b> | <b>61</b>  | <b>156</b> | <b>313</b> | <b>489</b>            | <b>683</b> | <b>1503</b> | <b>78</b>      | <b>7796</b>    |
| Men                            | 99              | 708         | 1032       | 104        | 182        | 322        | 475                   | 699        | 1734        | 96             | 7796           |
| Women                          | 107             | 612         | 695        | 67         | 153        | 281        | 492                   | 678        | 1348        | 78             | 6584           |

**Table S4. Daily retinol intake and distribution by sex and age group in the ANIBES Study population.**

| <b>RETINOL<br/>(µg/d)</b>      | <b><i>n</i></b> | <b>Mean</b> | <b>SD</b>  | <b>SEM</b> | <b>P5</b> | <b>P25</b> | <b>P50<br/>Median</b> | <b>P75</b> | <b>P95</b>  | <b>Minimum</b> | <b>Maximum</b> |
|--------------------------------|-----------------|-------------|------------|------------|-----------|------------|-----------------------|------------|-------------|----------------|----------------|
| <b>Total</b>                   | <b>2009</b>     | <b>364</b>  | <b>813</b> | <b>18</b>  | <b>48</b> | <b>117</b> | <b>187</b>            | <b>293</b> | <b>1118</b> | <b>0</b>       | <b>10881</b>   |
| Men                            | 996             | 399         | 899        | 28         | 52        | 125        | 199                   | 316        | 1381        | 0              | 10881          |
| Women                          | 1013            | 327         | 714        | 23         | 41        | 109        | 176                   | 275        | 956         | 0              | 7440           |
| <b>Children 9–12 years</b>     | <b>213</b>      | <b>420</b>  | <b>619</b> | <b>42</b>  | <b>72</b> | <b>154</b> | <b>227</b>            | <b>371</b> | <b>1569</b> | <b>18</b>      | <b>5950</b>    |
| Men                            | 126             | 461         | 556        | 50         | 72        | 163        | 262                   | 413        | 1895        | 18             | 2802           |
| Women                          | 87              | 362         | 701        | 75         | 77        | 137        | 211                   | 324        | 908         | 46             | 5950           |
| <b>Adolescents 13–17 years</b> | <b>211</b>      | <b>343</b>  | <b>419</b> | <b>29</b>  | <b>66</b> | <b>141</b> | <b>218</b>            | <b>343</b> | <b>1256</b> | <b>0</b>       | <b>2697</b>    |
| Men                            | 137             | 359         | 433        | 37         | 79        | 156        | 237                   | 361        | 1342        | 0              | 2697           |
| Women                          | 74              | 312         | 391        | 45         | 54        | 124        | 204                   | 319        | 1208        | 21             | 2392           |
| <b>Adults 18–64 years</b>      | <b>1655</b>     | <b>363</b>  | <b>830</b> | <b>20</b>  | <b>48</b> | <b>119</b> | <b>186</b>            | <b>292</b> | <b>1096</b> | <b>0</b>       | <b>10881</b>   |
| Men                            | 798             | 395         | 926        | 33         | 52        | 126        | 197                   | 315        | 1290        | 0              | 10881          |
| Women                          | 857             | 333         | 729        | 25         | 41        | 111        | 177                   | 275        | 969         | 0              | 7440           |
| <b>Elderly 65–75 years</b>     | <b>206</b>      | <b>309</b>  | <b>817</b> | <b>57</b>  | <b>37</b> | <b>96</b>  | <b>163</b>            | <b>260</b> | <b>633</b>  | <b>3</b>       | <b>7407</b>    |
| Men                            | 99              | 361         | 977        | 98         | 32        | 105        | 167                   | 260        | 673         | 3              | 7407           |
| Women                          | 107             | 261         | 634        | 61         | 38        | 86         | 160                   | 262        | 543         | 9              | 6494           |

**Table S5. Daily carotenes intake and distribution by sex and age group in the ANIBES Study population.**

| <b>CAROTENES<br/>(<math>\mu\text{g/d}</math>)</b> | <b><i>n</i></b> | <b>Mean</b> | <b>SD</b>   | <b>SEM</b> | <b>P5</b>  | <b>P25</b> | <b>P50<br/>Median</b> | <b>P75</b>  | <b>P95</b>  | <b>Minimum</b> | <b>Maximum</b> |
|---------------------------------------------------|-----------------|-------------|-------------|------------|------------|------------|-----------------------|-------------|-------------|----------------|----------------|
| <b>Total</b>                                      | <b>2009</b>     | <b>1735</b> | <b>1551</b> | <b>35</b>  | <b>242</b> | <b>688</b> | <b>1342</b>           | <b>2249</b> | <b>4655</b> | <b>13</b>      | <b>13962</b>   |
| Men                                               | 996             | 1652        | 1474        | 46         | 221        | 658        | 1231                  | 2171        | 4599        | 14             | 10960          |
| Women                                             | 1013            | 1820        | 1622        | 51         | 264        | 724        | 1415                  | 2330        | 4714        | 13             | 13962          |
| <b>Children 9–12 years</b>                        | <b>213</b>      | <b>1331</b> | <b>1137</b> | <b>78</b>  | <b>192</b> | <b>500</b> | <b>995</b>            | <b>1831</b> | <b>3681</b> | <b>42</b>      | <b>6222</b>    |
| Men                                               | 126             | 1283        | 1147        | 102        | 178        | 444        | 980                   | 1799        | 3480        | 50             | 5754           |
| Women                                             | 87              | 1402        | 1125        | 121        | 244        | 625        | 1023                  | 1930        | 3681        | 42             | 6222           |
| <b>Adolescents 13–17 years</b>                    | <b>211</b>      | <b>1254</b> | <b>1152</b> | <b>79</b>  | <b>141</b> | <b>483</b> | <b>882</b>            | <b>1598</b> | <b>3695</b> | <b>45</b>      | <b>6805</b>    |
| Men                                               | 137             | 1227        | 1165        | 100        | 147        | 476        | 873                   | 1441        | 3827        | 79             | 6197           |
| Women                                             | 74              | 1303        | 1136        | 132        | 103        | 621        | 993                   | 1673        | 3695        | 45             | 6805           |
| <b>Adults 18–64 years</b>                         | <b>1655</b>     | <b>1760</b> | <b>1577</b> | <b>39</b>  | <b>245</b> | <b>699</b> | <b>1355</b>           | <b>2257</b> | <b>4714</b> | <b>13</b>      | <b>13962</b>   |
| Men                                               | 798             | 1696        | 1513        | 54         | 243        | 681        | 1313                  | 2198        | 4698        | 14             | 10960          |
| Women                                             | 857             | 1819        | 1633        | 56         | 245        | 728        | 1419                  | 2291        | 4731        | 13             | 13962          |
| <b>Elderly 65–75 years</b>                        | <b>206</b>      | <b>2082</b> | <b>1750</b> | <b>122</b> | <b>292</b> | <b>872</b> | <b>1618</b>           | <b>2659</b> | <b>5095</b> | <b>97</b>      | <b>11643</b>   |
| Men                                               | 99              | 2068        | 1506        | 151        | 290        | 1022       | 1705                  | 2703        | 5304        | 123            | 6851           |
| Women                                             | 107             | 2095        | 1956        | 189        | 292        | 804        | 1528                  | 2659        | 5095        | 97             | 11643          |

**Table S6. Daily vitamin E intake and distribution by sex and age group in the ANIBES Study population.**

| <b>VITAMIN E<br/>(mg <math>\alpha</math>-TE/d)</b> | <b><i>n</i></b> | <b>Mean</b> | <b>SD</b>  | <b>SEM</b> | <b>P5</b>  | <b>P25</b> | <b>P50<br/>Median</b> | <b>P75</b> | <b>P95</b>  | <b>Minimum</b> | <b>Maximum</b> |
|----------------------------------------------------|-----------------|-------------|------------|------------|------------|------------|-----------------------|------------|-------------|----------------|----------------|
| <b>Total</b>                                       | <b>2009</b>     | <b>7.0</b>  | <b>3.8</b> | <b>0.1</b> | <b>2.4</b> | <b>4.5</b> | <b>6.3</b>            | <b>8.8</b> | <b>14.0</b> | <b>0.7</b>     | <b>55.2</b>    |
| Men                                                | 996             | 7.3         | 4.2        | 0.1        | 2.3        | 4.7        | 6.5                   | 9.1        | 14.8        | 0.7            | 55.2           |
| Women                                              | 1013            | 6.7         | 3.4        | 0.1        | 2.4        | 4.3        | 6.1                   | 8.5        | 13.1        | 0.7            | 27.5           |
| <b>Children 9–12 years</b>                         | <b>213</b>      | <b>7.4</b>  | <b>4.0</b> | <b>0.3</b> | <b>2.6</b> | <b>4.5</b> | <b>6.3</b>            | <b>9.5</b> | <b>15.5</b> | <b>0.7</b>     | <b>27.6</b>    |
| Men                                                | 126             | 7.4         | 4.0        | 0.4        | 2.6        | 4.8        | 6.1                   | 9.4        | 15.3        | 0.7            | 27.6           |
| Women                                              | 87              | 7.5         | 4.0        | 0.4        | 2.6        | 4.2        | 6.6                   | 9.7        | 16.0        | 2.2            | 19.1           |
| <b>Adolescents 13–17 years</b>                     | <b>211</b>      | <b>7.5</b>  | <b>4.5</b> | <b>0.3</b> | <b>2.4</b> | <b>4.4</b> | <b>6.4</b>            | <b>9.7</b> | <b>15.7</b> | <b>1.1</b>     | <b>31.0</b>    |
| Men                                                | 137             | 7.6         | 4.2        | 0.4        | 2.4        | 4.6        | 6.5                   | 9.6        | 15.8        | 1.1            | 24.0           |
| Women                                              | 74              | 7.4         | 5.0        | 0.6        | 2.4        | 4.1        | 6.3                   | 10.0       | 14.9        | 1.7            | 31.0           |
| <b>Adults 18–64 years</b>                          | <b>1655</b>     | <b>7.1</b>  | <b>3.9</b> | <b>0.1</b> | <b>2.4</b> | <b>4.6</b> | <b>6.5</b>            | <b>8.9</b> | <b>14.2</b> | <b>0.7</b>     | <b>55.2</b>    |
| Men                                                | 798             | 7.4         | 4.3        | 0.2        | 2.4        | 4.7        | 6.7                   | 9.1        | 14.8        | 0.9            | 55.2           |
| Women                                              | 857             | 6.8         | 3.4        | 0.1        | 2.4        | 4.4        | 6.3                   | 8.7        | 13.4        | 0.7            | 27.5           |
| <b>Elderly 65–75 years</b>                         | <b>206</b>      | <b>5.9</b>  | <b>2.9</b> | <b>0.2</b> | <b>2.2</b> | <b>3.9</b> | <b>5.2</b>            | <b>7.8</b> | <b>11.0</b> | <b>1.7</b>     | <b>16.6</b>    |
| Men                                                | 99              | 6.3         | 3.0        | 0.3        | 2.3        | 3.9        | 5.8                   | 8.1        | 12.1        | 1.8            | 16.6           |
| Women                                              | 107             | 5.6         | 2.7        | 0.3        | 2.1        | 3.9        | 4.9                   | 6.7        | 10.7        | 1.7            | 15.7           |

**Table S7. Daily vitamin C intake and distribution by sex and age group in the ANIBES Study population.**

| <b>VITAMIN C<br/>(mg/d)</b>    | <b><i>n</i></b> | <b>Mean</b>  | <b>SD</b>   | <b>SEM</b> | <b>P5</b>   | <b>P25</b>  | <b>P50<br/>Median</b> | <b>P75</b>   | <b>P95</b>   | <b>Minimum</b> | <b>Maximum</b> |
|--------------------------------|-----------------|--------------|-------------|------------|-------------|-------------|-----------------------|--------------|--------------|----------------|----------------|
| <b>Total</b>                   | <b>2009</b>     | <b>84.4</b>  | <b>61.5</b> | <b>1.4</b> | <b>20.4</b> | <b>42.6</b> | <b>71.3</b>           | <b>109.6</b> | <b>193.3</b> | <b>5.0</b>     | <b>802.7</b>   |
| Men                            | 996             | 83.2         | 63.9        | 2.0        | 19.0        | 39.7        | 68.9                  | 106.6        | 199.3        | 5.0            | 802.7          |
| Women                          | 1013            | 85.6         | 58.8        | 1.9        | 21.7        | 46.2        | 72.8                  | 112.9        | 188.7        | 8.0            | 788.6          |
| <b>Children 9–12 years</b>     | <b>213</b>      | <b>66.4</b>  | <b>46.1</b> | <b>3.2</b> | <b>16.8</b> | <b>34.4</b> | <b>57.2</b>           | <b>86.3</b>  | <b>156.8</b> | <b>6.9</b>     | <b>258.3</b>   |
| Men                            | 126             | 65.1         | 42.1        | 3.7        | 17.0        | 35.5        | 56.6                  | 82.8         | 145.4        | 6.9            | 210.6          |
| Women                          | 87              | 68.3         | 51.5        | 5.5        | 16.8        | 32.1        | 58.5                  | 95.1         | 156.8        | 11.8           | 258.3          |
| <b>Adolescents 13–17 years</b> | <b>211</b>      | <b>61.6</b>  | <b>45.5</b> | <b>3.1</b> | <b>15.2</b> | <b>30.3</b> | <b>49.3</b>           | <b>77.1</b>  | <b>164.0</b> | <b>4.5</b>     | <b>270.5</b>   |
| Men                            | 137             | 62.6         | 48.0        | 4.1        | 14.6        | 29.4        | 48.3                  | 77.1         | 172.2        | 4.5            | 270.5          |
| Women                          | 74              | 59.9         | 40.7        | 4.7        | 15.6        | 32.3        | 50.6                  | 74.6         | 151.7        | 8.8            | 234.3          |
| <b>Adults 18–64 years</b>      | <b>1655</b>     | <b>84.8</b>  | <b>61.8</b> | <b>1.5</b> | <b>19.5</b> | <b>43.3</b> | <b>71.8</b>           | <b>110.2</b> | <b>193.8</b> | <b>5.0</b>     | <b>802.7</b>   |
| Men                            | 798             | 85.2         | 65.5        | 2.3        | 19.0        | 40.5        | 72.0                  | 108.1        | 203.1        | 5.0            | 802.7          |
| Women                          | 857             | 84.5         | 58.2        | 2.0        | 19.5        | 45.8        | 71.8                  | 111.8        | 188.6        | 5.9            | 788.6          |
| <b>Elderly 65–75 years</b>     | <b>206</b>      | <b>106.6</b> | <b>68.3</b> | <b>4.8</b> | <b>28.1</b> | <b>59.1</b> | <b>94.6</b>           | <b>134.0</b> | <b>234.1</b> | <b>14.5</b>    | <b>478.8</b>   |
| Men                            | 99              | 109.4        | 72.3        | 7.3        | 23.8        | 56.6        | 96.6                  | 134.0        | 250.9        | 16.2           | 410.6          |
| Women                          | 107             | 104.1        | 64.6        | 6.2        | 29.0        | 59.1        | 91.6                  | 136.0        | 204.1        | 14.5           | 478.8          |

**Table S8. Dietary sources of zinc (%) from food groups/subgroups by sex and age groups in the ANIBES Spanish population.**

| ZINC                                     | Total 9–75   | Children 9–12 | Adolescents 13–17 | Adults 18–64 | Elderly 65–75 |
|------------------------------------------|--------------|---------------|-------------------|--------------|---------------|
| (%)                                      | 2009         | 213           | 211               | 1655         | 206           |
| <b>Alcoholic beverages</b>               | <b>0.59</b>  | <b>-</b>      | <b>0.01</b>       | <b>0.64</b>  | <b>0.88</b>   |
| <i>High alcohol content beverages</i>    | -            | -             | -                 | -            | -             |
| <i>Low alcohol content beverages</i>     | 0.59         | -             | 0.01              | 0.64         | 0.88          |
| <b>Appetizers</b>                        | <b>0.30</b>  | <b>0.65</b>   | <b>0.49</b>       | <b>0.29</b>  | <b>0.07</b>   |
| <b>Cereals/Grains</b>                    | <b>25.46</b> | <b>25.04</b>  | <b>26.32</b>      | <b>25.42</b> | <b>25.90</b>  |
| <i>Grains and flours</i>                 | 1.96         | 1.59          | 1.97              | 2.01         | 1.75          |
| <i>Breakfast cereals and cereal bars</i> | 0.17         | 0.04          | 0.09              | 0.20         | 0.15          |
| <i>Bread</i>                             | 16.93        | 15.31         | 15.79             | 16.90        | 18.81         |
| <i>White bread</i>                       | 14.38        | 14.32         | 14.92             | 14.17        | 15.85         |
| <i>Brown bread</i>                       | 2.19         | 0.80          | 0.64              | 2.35         | 2.67          |
| <i>Others breads</i>                     | 0.36         | 0.19          | 0.22              | 0.39         | 0.29          |
| <i>Pasta</i>                             | 3.22         | 3.81          | 4.23              | 3.25         | 2.01          |
| <i>Bakery and pastry</i>                 | 3.19         | 4.30          | 4.25              | 3.06         | 3.17          |
| <b>Eggs</b>                              | <b>4.56</b>  | <b>4.29</b>   | <b>4.50</b>       | <b>4.52</b>  | <b>5.48</b>   |
| <b>Fish</b>                              | <b>5.72</b>  | <b>3.69</b>   | <b>3.53</b>       | <b>5.80</b>  | <b>6.90</b>   |
| <i>White fish</i>                        | 1.11         | 1.03          | 0.62              | 1.04         | 2.05          |



| ZINC                                    | Total 9–75   | Children 9–12 | Adolescents 13–17 | Adults 18–64 | Elderly 65–75 |
|-----------------------------------------|--------------|---------------|-------------------|--------------|---------------|
| (%)                                     | 2009         | 213           | 211               | 1655         | 206           |
| <i>Oily fish</i>                        | 0.90         | 0.48          | 0.52              | 0.91         | 1.07          |
| <i>Shellfish</i>                        | 2.37         | 1.69          | 1.54              | 2.44         | 2.54          |
| <i>Canned fish</i>                      | 1.34         | 0.49          | 0.85              | 1.42         | 1.25          |
| <b>Fruits</b>                           | <b>3.52</b>  | <b>2.46</b>   | <b>1.88</b>       | <b>3.43</b>  | <b>5.88</b>   |
| <b>Meat and meat products</b>           | <b>28.53</b> | <b>29.37</b>  | <b>29.83</b>      | <b>28.74</b> | <b>24.72</b>  |
| <i>Meat</i>                             | 19.17        | 18.30         | 19.03             | 19.42        | 16.97         |
| <i>Red meat</i>                         | 8.63         | 9.01          | 7.69              | 8.63         | 8.57          |
| <i>White meat</i>                       | 5.45         | 4.57          | 5.64              | 5.64         | 4.26          |
| <i>Poultry</i>                          | 5.09         | 4.71          | 5.70              | 5.15         | 4.14          |
| <i>Viscera and offal</i>                | 0.46         | 0.11          | 0.07              | 0.48         | 0.63          |
| <i>Sausages and other meat products</i> | 8.90         | 10.97         | 10.73             | 8.84         | 7.12          |
| <b>Milk and dairy products</b>          | <b>15.82</b> | <b>18.88</b>  | <b>16.70</b>      | <b>15.59</b> | <b>15.80</b>  |
| <i>Milk</i>                             | 6.67         | 8.66          | 7.31              | 6.39         | 7.64          |
| <i>Whole milk</i>                       | 2.01         | 4.10          | 3.39              | 1.83         | 2.09          |
| <i>Semi skimmed milk</i>                | 2.99         | 3.82          | 2.86              | 2.91         | 2.90          |
| <i>Skimmed milk</i>                     | 1.53         | 0.72          | 1.03              | 1.51         | 2.50          |
| <i>Other dairy</i>                      | 0.13         | 0.01          | 0.04              | 0.14         | 0.15          |

| <b>ZINC</b>                             | <b>Total 9–75</b> | <b>Children 9–12</b> | <b>Adolescents 13–17</b> | <b>Adults 18–64</b> | <b>Elderly 65–75</b> |
|-----------------------------------------|-------------------|----------------------|--------------------------|---------------------|----------------------|
| <b>(%)</b>                              | <b>2009</b>       | <b>213</b>           | <b>211</b>               | <b>1655</b>         | <b>206</b>           |
| <i><b>Yogurt and fermented milk</b></i> | 2.76              | 3.18                 | 2.01                     | 2.65                | 3.69                 |
| <i>Skimmed Fermented milk</i>           | 0.22              | 0.58                 | 0.17                     | 0.19                | 0.41                 |
| <i>Whole fermented milk</i>             | 0.14              | 0.04                 | 0.03                     | 0.14                | 0.15                 |
| <i>Skimmed milk yogurts</i>             | 0.71              | 0.12                 | 0.15                     | 0.71                | 1.05                 |
| <i>Whole milk yogurt</i>                | 1.70              | 2.45                 | 1.66                     | 1.61                | 2.08                 |
| <i><b>Cheese</b></i>                    | 5.75              | 5.07                 | 6.05                     | 5.96                | 4.23                 |
| <i><b>Other dairy products</b></i>      | 0.64              | 1.97                 | 1.32                     | 0.59                | 0.23                 |
| <b>Non-alcoholic beverages</b>          | <b>0.87</b>       | <b>0.89</b>          | <b>0.83</b>              | <b>0.89</b>         | <b>0.93</b>          |
| <i>Water</i>                            | -                 | -                    | -                        | -                   | -                    |
| <i>Coffee and herbal teas</i>           | 0.04              | -                    | -                        | 0.04                | 0.07                 |
| <i>Sugared soft drinks</i>              | -                 | -                    | -                        | -                   | -                    |
| <i>Unsweetened soft drinks</i>          | -                 | -                    | -                        | -                   | -                    |
| <i>Sports drinks</i>                    | -                 | -                    | -                        | -                   | -                    |
| <i>Juices and nectars</i>               | 0.52              | 0.86                 | 0.67                     | 0.50                | 0.47                 |
| <i>Energy drinks</i>                    | -                 | -                    | -                        | -                   | -                    |
| <i>Other non-alcoholic beverages</i>    | 0.31              | 0.03                 | 0.16                     | 0.35                | 0.39                 |
| <b>Oils and fats</b>                    | <b>0.04</b>       | <b>0.04</b>          | <b>0.05</b>              | <b>0.04</b>         | <b>0.04</b>          |

| ZINC                                     | Total 9–75  | Children 9–12 | Adolescents 13–17 | Adults 18–64 | Elderly 65–75 |
|------------------------------------------|-------------|---------------|-------------------|--------------|---------------|
| (%)                                      | 2009        | 213           | 211               | 1655         | 206           |
| <i>Olive oil</i>                         | -           | -             | -                 | -            | -             |
| <i>Other oils</i>                        | -           | -             | -                 | -            | -             |
| <i>Butter, margarine and shortening</i>  | 0.04        | 0.04          | 0.05              | 0.04         | 0.04          |
| <b>Pulses</b>                            | <b>3.53</b> | <b>3.24</b>   | <b>3.23</b>       | <b>3.48</b>  | <b>4.58</b>   |
| <b>Sauces and condiments</b>             | <b>0.49</b> | <b>0.56</b>   | <b>0.53</b>       | <b>0.50</b>  | <b>0.35</b>   |
| <b>Sugars and sweets</b>                 | <b>0.43</b> | <b>0.91</b>   | <b>0.71</b>       | <b>0.42</b>  | <b>0.17</b>   |
| <i>Sugar</i>                             | 0.07        | 0.02          | 0.04              | 0.08         | 0.08          |
| <i>Chocolate</i>                         | 0.34        | 0.86          | 0.63              | 0.33         | 0.10          |
| <i>Jams and other</i>                    | -           | -             | -                 | -            | -             |
| <i>Other sweets</i>                      | 0.01        | 0.03          | 0.03              | 0.02         | -             |
| <b>Supplements and meal replacements</b> | <b>0.21</b> | <b>0.10</b>   | <b>-</b>          | <b>0.25</b>  | <b>-</b>      |
| <b>Ready-to-eat-meals</b>                | <b>4.80</b> | <b>6.44</b>   | <b>7.84</b>       | <b>4.75</b>  | <b>1.91</b>   |
| <b>Vegetables</b>                        | <b>5.15</b> | <b>3.46</b>   | <b>3.54</b>       | <b>5.23</b>  | <b>6.39</b>   |

**Table S9. Dietary sources of selenium (%) from food groups/subgroups by sex and age groups in the ANIBES Spanish population.**

| SELENIUM                                 | Total 9–75   | Children 9–12 | Adolescents 13–17 | Adults 18–64 | Elderly 65–75 |
|------------------------------------------|--------------|---------------|-------------------|--------------|---------------|
| (%)                                      | 2009         | 213           | 211               | 1655         | 206           |
| <b>Alcoholic beverages</b>               | -            | -             | -                 | -            | -             |
| <i>High alcohol content beverages</i>    | -            | -             | -                 | -            | -             |
| <i>Low alcohol content beverages</i>     | -            | -             | -                 | -            | -             |
| <b>Appetizers</b>                        | <b>0.16</b>  | <b>0.22</b>   | <b>0.20</b>       | <b>0.17</b>  | <b>0.06</b>   |
| <b>Cereals/Grains</b>                    | <b>46.50</b> | <b>48.17</b>  | <b>50.77</b>      | <b>46.31</b> | <b>44.60</b>  |
| <i>Grains and flours</i>                 | 3.17         | 2.91          | 3.82              | 3.19         | 2.73          |
| <i>Breakfast cereals and cereal bars</i> | 0.12         | 0.01          | 0.08              | 0.14         | 0.12          |
| <i>Bread</i>                             | 29.66        | 28.47         | 29.30             | 29.63        | 30.97         |
| <i>White bread</i>                       | 25.77        | 26.83         | 27.91             | 25.47        | 26.60         |
| <i>Brown bread</i>                       | 3.13         | 1.25          | 1.00              | 3.35         | 3.73          |
| <i>Others breads</i>                     | 0.76         | 0.39          | 0.39              | 0.81         | 0.64          |
| <i>Pasta</i>                             | 10.15        | 12.81         | 13.78             | 10.04        | 7.23          |
| <i>Bakery and pastry</i>                 | 3.39         | 3.96          | 3.79              | 3.31         | 3.54          |
| <b>Eggs</b>                              | <b>4.54</b>  | <b>4.20</b>   | <b>4.58</b>       | <b>4.52</b>  | <b>5.47</b>   |
| <b>Fish</b>                              | <b>16.68</b> | <b>11.81</b>  | <b>9.79</b>       | <b>16.70</b> | <b>22.00</b>  |

| SELENIUM                                | Total 9–75   | Children 9–12 | Adolescents 13–17 | Adults 18–64 | Elderly 65–75 |
|-----------------------------------------|--------------|---------------|-------------------|--------------|---------------|
| (%)                                     | 2009         | 213           | 211               | 1655         | 206           |
| <i>White fish</i>                       | 5.21         | 5.71          | 3.33              | 4.85         | 9.19          |
| <i>Oily fish</i>                        | 3.58         | 2.24          | 1.85              | 3.57         | 4.58          |
| <i>Shellfish</i>                        | 4.03         | 2.27          | 2.33              | 4.20         | 4.44          |
| <i>Canned fish</i>                      | 3.85         | 1.60          | 2.28              | 4.08         | 3.78          |
| <b>Fruits</b>                           | <b>1.42</b>  | <b>0.95</b>   | <b>0.85</b>       | <b>1.43</b>  | <b>2.22</b>   |
| <b>Meat and meat products</b>           | <b>14.93</b> | <b>15.42</b>  | <b>15.89</b>      | <b>15.20</b> | <b>11.91</b>  |
| <i>Meat</i>                             | 9.70         | 8.12          | 9.78              | 10.00        | 8.06          |
| <i>Red meat</i>                         | 1.25         | 0.87          | 0.97              | 1.28         | 1.21          |
| <i>White meat</i>                       | 4.06         | 3.27          | 3.99              | 4.23         | 3.21          |
| <i>Poultry</i>                          | 4.39         | 3.98          | 4.82              | 4.49         | 3.64          |
| <i>Viscera and offal</i>                | 0.47         | 0.10          | 0.13              | 0.48         | 0.77          |
| <i>Sausages and other meat products</i> | 4.77         | 7.20          | 5.98              | 4.72         | 3.07          |
| <b>Milk and dairy products</b>          | <b>7.18</b>  | <b>8.80</b>   | <b>7.59</b>       | <b>7.06</b>  | <b>6.97</b>   |
| <i>Milk</i>                             | 2.76         | 3.59          | 3.11              | 2.65         | 3.17          |
| <i>Whole milk</i>                       | 0.83         | 1.82          | 1.40              | 0.76         | 0.83          |
| <i>Semi skimmed milk</i>                | 1.25         | 1.46          | 1.30              | 1.21         | 1.23          |
| <i>Skimmed milk</i>                     | 0.63         | 0.30          | 0.39              | 0.62         | 1.05          |

| SELENIUM                                | Total 9–75  | Children 9–12 | Adolescents 13–17 | Adults 18–64 | Elderly 65–75 |
|-----------------------------------------|-------------|---------------|-------------------|--------------|---------------|
| (%)                                     | 2009        | 213           | 211               | 1655         | 206           |
| <i>Other dairy</i>                      | 0.05        | 0.01          | 0.02              | 0.05         | 0.05          |
| <b><i>Yogurt and fermented milk</i></b> | 0.98        | 1.04          | 0.71              | 0.94         | 1.43          |
| <i>Skimmed Fermented milk</i>           | 0.07        | 0.22          | 0.06              | 0.06         | 0.18          |
| <i>Whole fermented milk</i>             | 0.06        | 0.02          | 0.03              | 0.05         | 0.13          |
| <i>Skimmed milk yogurts</i>             | 0.23        | 0.03          | 0.05              | 0.23         | 0.33          |
| <i>Whole milk yogurt</i>                | 0.62        | 0.78          | 0.57              | 0.59         | 0.79          |
| <b><i>Cheese</i></b>                    | 2.80        | 2.54          | 2.79              | 2.89         | 1.93          |
| <b><i>Other dairy products</i></b>      | 0.64        | 1.63          | 0.99              | 0.59         | 0.44          |
| <b>Non-alcoholic beverages</b>          | <b>0.70</b> | <b>0.77</b>   | <b>0.71</b>       | <b>0.75</b>  | <b>0.47</b>   |
| <i>Water</i>                            | -           | -             | -                 | -            | -             |
| <i>Coffee and herbal teas</i>           | -           | -             | -                 | -            | -             |
| <i>Sugared soft drinks</i>              | 0.11        | 0.07          | 0.15              | 0.12         | 0.02          |
| <i>Unsweetened soft drinks</i>          | 0.05        | 0.02          | 0.03              | 0.05         | 0.02          |
| <i>Sports drinks</i>                    | -           | -             | -                 | -            | -             |
| <i>Juices and nectars</i>               | 0.36        | 0.67          | 0.48              | 0.35         | 0.19          |
| <i>Energy drinks</i>                    | -           | -             | -                 | -            | -             |
| <i>Other non-alcoholic beverages</i>    | 0.19        | 0.02          | 0.05              | 0.23         | 0.24          |

| SELENIUM                                 | Total 9–75  | Children 9–12 | Adolescents 13–17 | Adults 18–64 | Elderly 65–75 |
|------------------------------------------|-------------|---------------|-------------------|--------------|---------------|
| (%)                                      | 2009        | 213           | 211               | 1655         | 206           |
| <b>Oils and fats</b>                     | -           | -             | -                 | -            | -             |
| <i>Olive oil</i>                         | -           | -             | -                 | -            | -             |
| <i>Other oils</i>                        | -           | -             | -                 | -            | -             |
| <i>Butter, margarine and shortening</i>  | -           | -             | -                 | -            | -             |
| <b>Pulses</b>                            | <b>1.58</b> | <b>1.44</b>   | <b>1.37</b>       | <b>1.55</b>  | <b>2.10</b>   |
| <b>Sauces and condiments</b>             | <b>0.18</b> | <b>0.10</b>   | <b>0.19</b>       | <b>0.20</b>  | <b>0.10</b>   |
| <b>Sugars and sweets</b>                 | <b>0.93</b> | <b>2.22</b>   | <b>2.25</b>       | <b>0.84</b>  | <b>0.27</b>   |
| <i>Sugar</i>                             | 0.01        | -             | -                 | 0.01         | 0.01          |
| <i>Chocolate</i>                         | 0.91        | 2.21          | 2.24              | 0.82         | 0.25          |
| <i>Jams and other</i>                    | 0.01        | -             | -                 | 0.01         | 0.02          |
| <i>Other sweets</i>                      | -           | -             | -                 | -            | -             |
| <b>Supplements and meal replacements</b> | <b>0.13</b> | <b>0.08</b>   | -                 | <b>0.16</b>  | -             |
| <b>Ready-to-eat-meals</b>                | <b>2.62</b> | <b>4.09</b>   | <b>4.16</b>       | <b>2.57</b>  | <b>1.07</b>   |
| <b>Vegetables</b>                        | <b>2.43</b> | <b>1.74</b>   | <b>1.65</b>       | <b>2.56</b>  | <b>2.77</b>   |

**Table S10. Dietary sources of vitamin A (%) from food groups/subgroups by sex and age groups in the ANIBES Spanish population.**

| VITAMIN A                                | Total 9–75   | Children 9–12 | Adolescents 13–17 | Adults 18–64 | Elderly 65–75 |
|------------------------------------------|--------------|---------------|-------------------|--------------|---------------|
| (%)                                      | 2009         | 213           | 211               | 1655         | 206           |
| <b>Alcoholic beverages</b>               | -            | -             | -                 | -            | -             |
| <i>High alcohol content beverages</i>    | -            | -             | -                 | -            | -             |
| <i>Low alcohol content beverages</i>     | -            | -             | -                 | -            | -             |
| <b>Appetizers</b>                        | <b>0.18</b>  | <b>0.26</b>   | <b>0.11</b>       | <b>0.17</b>  | <b>0.18</b>   |
| <b>Cereals/Grains</b>                    | <b>4.53</b>  | <b>4.40</b>   | <b>5.93</b>       | <b>4.53</b>  | <b>3.42</b>   |
| <i>Grains and flours</i>                 | 0.05         | 0.05          | 0.04              | 0.06         | 0.03          |
| <i>Breakfast cereals and cereal bars</i> | -            | -             | -                 | -            | -             |
| <i>Bread</i>                             | -            | -             | -                 | -            | -             |
| <i>White bread</i>                       | -            | -             | -                 | -            | -             |
| <i>Brown bread</i>                       | -            | -             | -                 | -            | -             |
| <i>Others breads</i>                     | -            | -             | -                 | -            | -             |
| <i>Pasta</i>                             | 0.05         | 0.05          | 0.04              | 0.07         | -             |
| <i>Bakery and pastry</i>                 | 4.42         | 4.30          | 5.85              | 4.40         | 3.39          |
| <b>Eggs</b>                              | <b>10.99</b> | <b>10.88</b>  | <b>11.98</b>      | <b>10.89</b> | <b>11.87</b>  |
| <b>Fish</b>                              | <b>4.20</b>  | <b>3.26</b>   | <b>3.30</b>       | <b>4.27</b>  | <b>4.67</b>   |



| VITAMIN A                               | Total 9–75   | Children 9–12 | Adolescents 13–17 | Adults 18–64 | Elderly 65–75 |
|-----------------------------------------|--------------|---------------|-------------------|--------------|---------------|
| (%)                                     | 2009         | 213           | 211               | 1655         | 206           |
| <i>White fish</i>                       | 0.17         | 0.11          | 0.07              | 0.18         | 0.15          |
| <i>Oily fish</i>                        | 1.57         | 1.71          | 1.30              | 1.50         | 2.22          |
| <i>Shellfish</i>                        | 0.92         | 0.63          | 0.66              | 0.96         | 0.98          |
| <i>Canned fish</i>                      | 1.54         | 0.81          | 1.27              | 1.63         | 1.31          |
| <b>Fruits</b>                           | <b>6.86</b>  | <b>4.06</b>   | <b>3.59</b>       | <b>6.73</b>  | <b>11.31</b>  |
| <b>Meat and meat products</b>           | <b>2.87</b>  | <b>5.35</b>   | <b>2.59</b>       | <b>2.76</b>  | <b>1.69</b>   |
| <i>Meat</i>                             | 0.02         | 0.01          | -                 | -            | 0.04          |
| <i>Red meat</i>                         | 0.02         | 0.01          | -                 | -            | 0.04          |
| <i>White meat</i>                       | -            | -             | -                 | -            | -             |
| <i>Poultry</i>                          | -            | -             | -                 | -            | -             |
| <i>Viscera and offal</i>                | 0.63         | 0.15          | -                 | 0.68         | 0.63          |
| <i>Sausages and other meat products</i> | 2.23         | 5.18          | 2.59              | 2.06         | 1.02          |
| <b>Milk and dairy products</b>          | <b>21.73</b> | <b>30.31</b>  | <b>29.72</b>      | <b>21.56</b> | <b>16.41</b>  |
| <i>Milk</i>                             | 5.82         | 11.66         | 10.76             | 5.28         | 5.35          |
| <i>Whole milk</i>                       | 5.54         | 11.64         | 10.67             | 4.99         | 5.11          |
| <i>Semi skimmed milk</i>                | -            | -             | -                 | -            | -             |
| <i>Skimmed milk</i>                     | -            | -             | -                 | -            | -             |

| VITAMIN A                            | Total 9–75  | Children 9–12 | Adolescents 13–17 | Adults 18–64 | Elderly 65–75 |
|--------------------------------------|-------------|---------------|-------------------|--------------|---------------|
| (%)                                  | 2009        | 213           | 211               | 1655         | 206           |
| <i>Other dairy</i>                   | 0.28        | 0.02          | 0.09              | 0.30         | 0.24          |
| <i>Yogurt and fermented milk</i>     | 2.47        | 3.02          | 2.59              | 2.34         | 3.22          |
| <i>Skimmed Fermented milk</i>        | 0.04        | 0.11          | 0.04              | 0.03         | 0.08          |
| <i>Whole fermented milk</i>          | 0.23        | 0.05          | 0.05              | 0.22         | 0.48          |
| <i>Skimmed milk yogurts</i>          | 0.14        | 0.04          | 0.19              | 0.13         | 0.14          |
| <i>Whole milk yogurt</i>             | 2.06        | 2.82          | 2.31              | 1.97         | 2.52          |
| <i>Cheese</i>                        | 10.31       | 9.82          | 12.42             | 10.78        | 6.31          |
| <i>Other dairy products</i>          | 3.13        | 5.81          | 3.95              | 3.15         | 1.53          |
| <b>Non-alcoholic beverages</b>       | <b>1.24</b> | <b>2.37</b>   | <b>2.18</b>       | <b>1.18</b>  | <b>0.83</b>   |
| <i>Water</i>                         | -           | -             | -                 | -            | -             |
| <i>Coffee and herbal teas</i>        | -           | -             | -                 | -            | -             |
| <i>Sugared soft drinks</i>           | -           | -             | -                 | -            | -             |
| <i>Unsweetened soft drinks</i>       | -           | -             | -                 | -            | -             |
| <i>Sports drinks</i>                 | -           | -             | -                 | -            | -             |
| <i>Juices and nectars</i>            | 1.24        | 2.37          | 2.18              | 1.18         | 0.83          |
| <i>Energy drinks</i>                 | -           | -             | -                 | -            | -             |
| <i>Other non-alcoholic beverages</i> | -           | -             | -                 | -            | -             |

| VITAMIN A                                | Total 9–75   | Children 9–12 | Adolescents 13–17 | Adults 18–64 | Elderly 65–75 |
|------------------------------------------|--------------|---------------|-------------------|--------------|---------------|
| (%)                                      | 2009         | 213           | 211               | 1655         | 206           |
| <b>Oils and fats</b>                     | <b>5.63</b>  | <b>5.54</b>   | <b>5.62</b>       | <b>5.59</b>  | <b>6.54</b>   |
| <i>Olive oil</i>                         | 0.38         | 0.34          | 0.25              | 0.39         | 0.47          |
| <i>Other oils</i>                        | -            | -             | -                 | -            | -             |
| <i>Butter, margarine and shortening</i>  | 5.26         | 5.20          | 5.38              | 5.20         | 6.07          |
| <b>Pulses</b>                            | <b>0.94</b>  | <b>0.75</b>   | <b>0.77</b>       | <b>0.95</b>  | <b>1.09</b>   |
| <b>Sauces and condiments</b>             | <b>3.60</b>  | <b>3.70</b>   | <b>4.75</b>       | <b>3.72</b>  | <b>1.65</b>   |
| <b>Sugars and sweets</b>                 | <b>0.27</b>  | <b>0.57</b>   | <b>0.48</b>       | <b>0.24</b>  | <b>0.13</b>   |
| <i>Sugar</i>                             | -            | -             | -                 | -            | -             |
| <i>Chocolate</i>                         | 0.22         | 0.44          | 0.47              | 0.21         | 0.04          |
| <i>Jams and other</i>                    | 0.03         | 0.02          | 0.01              | 0.03         | 0.09          |
| <i>Other sweets</i>                      | 0.01         | 0.10          | -                 | -            | -             |
| <b>Supplements and meal replacements</b> | <b>0.19</b>  | <b>0.21</b>   | <b>-</b>          | <b>0.23</b>  | <b>0.20</b>   |
| <b>Ready-to-eat-meals</b>                | <b>5.45</b>  | <b>6.85</b>   | <b>9.19</b>       | <b>5.24</b>  | <b>3.49</b>   |
| <b>Vegetables</b>                        | <b>31.32</b> | <b>21.52</b>  | <b>19.78</b>      | <b>31.94</b> | <b>36.54</b>  |

**Table S11. Dietary sources of retinol (%) from food groups/subgroups by sex and age groups in the ANIBES Spanish population.**

| RETINOL                                  | Total 9–75   | Children 9–12 | Adolescents 13–17 | Adults 18–64 | Elderly 65–75 |
|------------------------------------------|--------------|---------------|-------------------|--------------|---------------|
| (%)                                      | 2009         | 213           | 211               | 1655         | 206           |
| <b>Alcoholic beverages</b>               | -            | -             | -                 | -            | -             |
| <i>High alcohol content beverages</i>    | -            | -             | -                 | -            | -             |
| <i>Low alcohol content beverages</i>     | -            | -             | -                 | -            | -             |
| <b>Appetizers</b>                        | -            | -             | -                 | -            | -             |
| <b>Cereals/Grains</b>                    | <b>8.27</b>  | <b>7.34</b>   | <b>9.67</b>       | <b>8.45</b>  | <b>6.09</b>   |
| <i>Grains and flours</i>                 | -            | -             | -                 | -            | -             |
| <i>Breakfast cereals and cereal bars</i> | -            | -             | -                 | -            | -             |
| <i>Bread</i>                             | -            | -             | -                 | -            | -             |
| <i>White bread</i>                       | -            | -             | -                 | -            | -             |
| <i>Brown bread</i>                       | -            | -             | -                 | -            | -             |
| <i>Others breads</i>                     | -            | -             | -                 | -            | -             |
| <i>Pasta</i>                             | 0.05         | 0.09          | -                 | 0.07         | -             |
| <i>Bakery and pastry</i>                 | 8.21         | 7.24          | 9.67              | 8.37         | 6.09          |
| <b>Eggs</b>                              | <b>22.58</b> | <b>18.84</b>  | <b>20.35</b>      | <b>22.49</b> | <b>27.16</b>  |
| <b>Fish</b>                              | <b>11.42</b> | <b>6.53</b>   | <b>6.93</b>       | <b>11.68</b> | <b>14.77</b>  |
| <i>White fish</i>                        | 0.64         | 0.37          | 0.28              | 0.67         | 0.88          |

| RETINOL                                 | Total 9–75   | Children 9–12 | Adolescents 13–17 | Adults 18–64 | Elderly 65–75 |
|-----------------------------------------|--------------|---------------|-------------------|--------------|---------------|
| (%)                                     | 2009         | 213           | 211               | 1655         | 206           |
| <i>Oily fish</i>                        | 3.28         | 2.54          | 1.88              | 3.18         | 4.84          |
| <i>Shellfish</i>                        | 2.62         | 1.59          | 1.79              | 2.75         | 3.37          |
| <i>Canned fish</i>                      | 4.89         | 2.02          | 2.98              | 5.08         | 5.68          |
| <b>Fruits</b>                           | -            | -             | -                 | -            | -             |
| <b>Meat and meat products</b>           | <b>2.80</b>  | <b>5.47</b>   | <b>2.59</b>       | <b>2.69</b>  | <b>1.60</b>   |
| <i>Meat</i>                             | 0.01         | -             | -                 | 0.02         | -             |
| <i>Red meat</i>                         | -            | -             | -                 | -            | -             |
| <i>White meat</i>                       | -            | -             | -                 | -            | -             |
| <i>Poultry</i>                          | 0.01         | -             | -                 | 0.02         | -             |
| <i>Viscera and offal</i>                | 0.66         | 0.23          | -                 | 0.73         | 0.64          |
| <i>Sausages and other meat products</i> | 2.13         | 5.24          | 2.59              | 1.95         | 0.97          |
| <b>Milk and dairy products</b>          | <b>38.67</b> | <b>45.92</b>  | <b>40.88</b>      | <b>38.37</b> | <b>37.27</b>  |
| <i>Milk</i>                             | 10.03        | 16.86         | 14.98             | 9.39         | 9.76          |
| <i>Whole milk</i>                       | 9.46         | 16.79         | 14.87             | 8.77         | 9.24          |
| <i>Semi skimmed milk</i>                | -            | -             | -                 | -            | -             |
| <i>Skimmed milk</i>                     | -            | -             | -                 | -            | -             |
| <i>Other dairy</i>                      | 0.57         | 0.07          | 0.11              | 0.62         | 0.52          |

| RETINOL                              | Total 9–75  | Children 9–12 | Adolescents 13–17 | Adults 18–64 | Elderly 65–75 |
|--------------------------------------|-------------|---------------|-------------------|--------------|---------------|
| (%)                                  | 2009        | 213           | 211               | 1655         | 206           |
| <i>Yogurt and fermented milk</i>     | 7.42        | 6.62          | 5.41              | 7.06         | 11.90         |
| <i>Skimmed Fermented milk</i>        | 0.32        | 0.55          | 0.40              | 0.24         | 0.87          |
| <i>Whole fermented milk</i>          | 0.59        | 0.13          | 0.06              | 0.63         | 0.90          |
| <i>Skimmed milk yogurts</i>          | 0.98        | 0.09          | 0.23              | 0.93         | 1.87          |
| <i>Whole milk yogurt</i>             | 5.53        | 5.85          | 4.71              | 5.25         | 8.27          |
| <i>Cheese</i>                        | 16.38       | 13.57         | 15.53             | 17.08        | 12.57         |
| <i>Other dairy products</i>          | 4.84        | 8.88          | 4.97              | 4.84         | 3.03          |
| <b>Non-alcoholic beverages</b>       | -           | -             | -                 | -            | -             |
| <i>Water</i>                         | -           | -             | -                 | -            | -             |
| <i>Coffee and herbal teas</i>        | -           | -             | -                 | -            | -             |
| <i>Sugared soft drinks</i>           | -           | -             | -                 | -            | -             |
| <i>Unsweetened soft drinks</i>       | -           | -             | -                 | -            | -             |
| <i>Sports drinks</i>                 | -           | -             | -                 | -            | -             |
| <i>Juices and nectars</i>            | -           | -             | -                 | -            | -             |
| <i>Energy drinks</i>                 | -           | -             | -                 | -            | -             |
| <i>Other non-alcoholic beverages</i> | -           | -             | -                 | -            | -             |
| <b>Oils and fats</b>                 | <b>8.81</b> | <b>7.95</b>   | <b>8.03</b>       | <b>8.87</b>  | <b>9.86</b>   |

| RETINOL                                  | Total 9–75  | Children 9–12 | Adolescents 13–17 | Adults 18–64 | Elderly 65–75 |
|------------------------------------------|-------------|---------------|-------------------|--------------|---------------|
| (%)                                      | 2009        | 213           | 211               | 1655         | 206           |
| <i>Olive oil</i>                         | -           | -             | -                 | -            | -             |
| <i>Other oils</i>                        | -           | -             | -                 | -            | -             |
| <i>Butter, margarine and shortening</i>  | 8.81        | 7.95          | 8.03              | 8.87         | 9.86          |
| <b>Pulses</b>                            | -           | -             | -                 | -            | -             |
| <b>Sauces and condiments</b>             | <b>1.98</b> | <b>0.86</b>   | <b>2.20</b>       | <b>2.12</b>  | <b>0.84</b>   |
| <b>Sugars and sweets</b>                 | <b>0.04</b> | <b>0.01</b>   | <b>0.17</b>       | <b>0.02</b>  | -             |
| <i>Sugar</i>                             | -           | -             | -                 | -            | -             |
| <i>Chocolate</i>                         | 0.04        | 0.01          | 0.17              | 0.02         | -             |
| <i>Jams and other</i>                    | -           | -             | -                 | -            | -             |
| <i>Other sweets</i>                      | -           | -             | -                 | -            | -             |
| <b>Supplements and meal replacements</b> | -           | -             | -                 | -            | -             |
| <b>Ready-to-eat-meals</b>                | <b>5.37</b> | <b>7.06</b>   | <b>8.99</b>       | <b>5.27</b>  | <b>2.26</b>   |
| <b>Vegetables</b>                        | <b>0.05</b> | <b>0.02</b>   | <b>0.18</b>       | <b>0.04</b>  | <b>0.15</b>   |

**Table S12. Dietary sources of carotenes (%) from food groups/subgroups by sex and age groups in the ANIBES Spanish population.**

| CAROTENES                                | Total 9–75  | Children 9–12 | Adolescents 13–17 | Adults 18–64 | Elderly 65–75 |
|------------------------------------------|-------------|---------------|-------------------|--------------|---------------|
| (%)                                      | 2009        | 213           | 211               | 1655         | 206           |
| <b>Alcoholic beverages</b>               | <b>0.01</b> | -             | -                 | <b>0.01</b>  | -             |
| <i>High alcohol content beverages</i>    | -           | -             | -                 | -            | -             |
| <i>Low alcohol content beverages</i>     | 0.01        | -             | -                 | 0.01         | -             |
| <b>Appetizers</b>                        | <b>0.64</b> | <b>0.82</b>   | <b>0.31</b>       | <b>0.72</b>  | <b>0.25</b>   |
| <b>Cereals/Grains</b>                    | <b>0.37</b> | <b>0.40</b>   | <b>0.26</b>       | <b>0.41</b>  | <b>0.10</b>   |
| <i>Grains and flours</i>                 | 0.14        | 0.21          | 0.10              | 0.15         | 0.06          |
| <i>Breakfast cereals and cereal bars</i> | -           | -             | -                 | -            | -             |
| <i>Bread</i>                             | -           | -             | -                 | -            | -             |
| <i>White bread</i>                       | -           | -             | -                 | -            | -             |
| <i>Brown bread</i>                       | -           | -             | -                 | -            | -             |
| <i>Others breads</i>                     | -           | -             | -                 | -            | -             |
| <i>Pasta</i>                             | 0.09        | 0.03          | 0.13              | 0.10         | -             |
| <i>Bakery and pastry</i>                 | 0.14        | 0.16          | 0.03              | 0.16         | 0.05          |
| <b>Eggs</b>                              | -           | -             | -                 | -            | -             |
| <b>Fish</b>                              | -           | -             | -                 | -            | -             |
| <i>White fish</i>                        | -           | -             | -                 | -            | -             |



| CAROTENES                               | Total 9–75   | Children 9–12 | Adolescents 13–17 | Adults 18–64 | Elderly 65–75 |
|-----------------------------------------|--------------|---------------|-------------------|--------------|---------------|
| (%)                                     | 2009         | 213           | 211               | 1655         | 206           |
| <i>Oily fish</i>                        | -            | -             | -                 | -            | -             |
| <i>Shellfish</i>                        | -            | -             | -                 | -            | -             |
| <i>Canned fish</i>                      | -            | -             | -                 | -            | -             |
| <b>Fruits</b>                           | <b>13.48</b> | <b>10.90</b>  | <b>8.76</b>       | <b>13.04</b> | <b>21.17</b>  |
| <b>Meat and meat products</b>           | <b>0.17</b>  | <b>0.19</b>   | <b>0.16</b>       | <b>0.16</b>  | <b>0.14</b>   |
| <i>Meat</i>                             | -            | -             | -                 | -            | -             |
| <i>Red meat</i>                         | -            | -             | -                 | -            | -             |
| <i>White meat</i>                       | -            | -             | -                 | -            | -             |
| <i>Poultry</i>                          | -            | -             | -                 | -            | -             |
| <i>Viscera and offal</i>                | 0.05         | 0.08          | -                 | 0.06         | -             |
| <i>Sausages and other meat products</i> | 0.12         | 0.10          | 0.16              | 0.10         | 0.14          |
| <b>Milk and dairy products</b>          | <b>7.53</b>  | <b>11.15</b>  | <b>12.58</b>      | <b>7.45</b>  | <b>4.69</b>   |
| <i>Milk</i>                             | 2.91         | 5.64          | 6.94              | 2.62         | 2.37          |
| <i>Whole milk</i>                       | 2.81         | 5.64          | 6.90              | 2.51         | 2.33          |
| <i>Semi skimmed milk</i>                | -            | -             | -                 | -            | -             |
| <i>Skimmed milk</i>                     | -            | -             | -                 | -            | -             |
| <i>Other dairy</i>                      | 0.10         | -             | 0.04              | 0.11         | 0.03          |

| CAROTENES                            | Total 9–75  | Children 9–12 | Adolescents 13–17 | Adults 18–64 | Elderly 65–75 |
|--------------------------------------|-------------|---------------|-------------------|--------------|---------------|
| (%)                                  | 2009        | 213           | 211               | 1655         | 206           |
| <i>Yogurt and fermented milk</i>     | -           | -             | -                 | -            | -             |
| <i>Skimmed Fermented milk</i>        | -           | -             | -                 | -            | -             |
| <i>Whole fermented milk</i>          | -           | -             | -                 | -            | -             |
| <i>Skimmed milk yogurts</i>          | -           | -             | -                 | -            | -             |
| <i>Whole milk yogurt</i>             | -           | -             | -                 | -            | -             |
| <i>Cheese</i>                        | 3.76        | 4.33          | 4.85              | 3.89         | 2.27          |
| <i>Other dairy products</i>          | 0.85        | 1.19          | 0.78              | 0.93         | 0.05          |
| <b>Non-alcoholic beverages</b>       | <b>3.18</b> | <b>6.75</b>   | <b>5.75</b>       | <b>3.06</b>  | <b>1.77</b>   |
| <i>Water</i>                         | -           | -             | -                 | -            | -             |
| <i>Coffee and herbal teas</i>        | -           | -             | -                 | -            | -             |
| <i>Sugared soft drinks</i>           | -           | -             | -                 | -            | -             |
| <i>Unsweetened soft drinks</i>       | -           | -             | -                 | -            | -             |
| <i>Sports drinks</i>                 | -           | -             | -                 | -            | -             |
| <i>Juices and nectars</i>            | 3.18        | 6.75          | 5.75              | 3.06         | 1.77          |
| <i>Energy drinks</i>                 | -           | -             | -                 | -            | -             |
| <i>Other non-alcoholic beverages</i> | -           | -             | -                 | -            | -             |
| <b>Oils and fats</b>                 | <b>2.92</b> | <b>3.21</b>   | <b>3.78</b>       | <b>2.95</b>  | <b>2.81</b>   |

| CAROTENES                                | Total 9–75   | Children 9–12 | Adolescents 13–17 | Adults 18–64 | Elderly 65–75 |
|------------------------------------------|--------------|---------------|-------------------|--------------|---------------|
| (%)                                      | 2009         | 213           | 211               | 1655         | 206           |
| <i>Olive oil</i>                         | 1.28         | 1.47          | 1.43              | 1.32         | 0.98          |
| <i>Other oils</i>                        | -            | -             | -                 | -            | -             |
| <i>Butter, margarine and shortening</i>  | 1.64         | 1.74          | 2.34              | 1.63         | 1.82          |
| <b>Pulses</b>                            | <b>2.14</b>  | <b>2.43</b>   | <b>2.29</b>       | <b>2.06</b>  | <b>2.41</b>   |
| <b>Sauces and condiments</b>             | <b>8.35</b>  | <b>12.14</b>  | <b>13.92</b>      | <b>8.32</b>  | <b>3.68</b>   |
| <b>Sugars and sweets</b>                 | <b>1.13</b>  | <b>2.39</b>   | <b>2.39</b>       | <b>1.07</b>  | <b>0.51</b>   |
| <i>Sugar</i>                             | -            | -             | -                 | -            | -             |
| <i>Chocolate</i>                         | 0.96         | 2.05          | 2.28              | 0.95         | 0.10          |
| <i>Jams and other</i>                    | 0.15         | 0.10          | 0.11              | 0.13         | 0.41          |
| <i>Other sweets</i>                      | 0.02         | 0.24          | -                 | -            | -             |
| <b>Supplements and meal replacements</b> | <b>-</b>     | <b>-</b>      | <b>-</b>          | <b>-</b>     | <b>-</b>      |
| <b>Ready-to-eat-meals</b>                | <b>7.36</b>  | <b>9.43</b>   | <b>11.50</b>      | <b>6.97</b>  | <b>6.06</b>   |
| <b>Vegetables</b>                        | <b>52.72</b> | <b>40.19</b>  | <b>38.31</b>      | <b>53.77</b> | <b>56.40</b>  |

**Table S13. Dietary sources of vitamin E (%) from food groups/subgroups by sex and age groups in the ANIBES Spanish population.**

| VITAMIN E                                | Total 9–75  | Children 9–12 | Adolescents 13–17 | Adults 18–64 | Elderly 65–75 |
|------------------------------------------|-------------|---------------|-------------------|--------------|---------------|
| (%)                                      | 2009        | 213           | 211               | 1655         | 206           |
| <b>Alcoholic beverages</b>               | -           | -             | -                 | -            | -             |
| <i>High alcohol content beverages</i>    | -           | -             | -                 | -            | -             |
| <i>Low alcohol content beverages</i>     | -           | -             | -                 | -            | -             |
| <b>Appetizers</b>                        | <b>0.95</b> | <b>1.58</b>   | <b>0.89</b>       | <b>0.99</b>  | <b>0.50</b>   |
| <b>Cereals/Grains</b>                    | <b>3.93</b> | <b>5.00</b>   | <b>6.63</b>       | <b>3.92</b>  | <b>3.07</b>   |
| <i>Grains and flours</i>                 | 1.24        | 0.85          | 1.52              | 1.23         | 1.29          |
| <i>Breakfast cereals and cereal bars</i> | 0.18        | 0.02          | 0.11              | 0.24         | 0.18          |
| <i>Bread</i>                             | 0.57        | 0.31          | 0.28              | 0.59         | 0.61          |
| <i>White bread</i>                       | -           | -             | -                 | -            | -             |
| <i>Brown bread</i>                       | 0.23        | 0.10          | 0.08              | 0.24         | 0.34          |
| <i>Others breads</i>                     | 0.33        | 0.20          | 0.20              | 0.35         | 0.27          |
| <i>Pasta</i>                             | 0.05        | -             | 0.05              | 0.05         | -             |
| <i>Bakery and pastry</i>                 | 1.90        | 3.81          | 4.69              | 1.81         | 0.99          |
| <b>Eggs</b>                              | <b>4.26</b> | <b>4.36</b>   | <b>4.60</b>       | <b>4.12</b>  | <b>5.43</b>   |
| <b>Fish</b>                              | <b>9.69</b> | <b>5.51</b>   | <b>6.38</b>       | <b>9.93</b>  | <b>11.55</b>  |

| VITAMIN E                               | Total 9–75  | Children 9–12 | Adolescents 13–17 | Adults 18–64 | Elderly 65–75 |
|-----------------------------------------|-------------|---------------|-------------------|--------------|---------------|
| (%)                                     | 2009        | 213           | 211               | 1655         | 206           |
| <i>White fish</i>                       | 1.35        | 1.32          | 0.76              | 1.29         | 2.19          |
| <i>Oily fish</i>                        | 1.28        | 0.56          | 0.73              | 1.27         | 2.14          |
| <i>Shellfish</i>                        | 2.11        | 1.39          | 1.43              | 2.14         | 2.35          |
| <i>Canned fish</i>                      | 4.94        | 2.24          | 3.46              | 5.22         | 4.87          |
| <b>Fruits</b>                           | <b>4.81</b> | <b>3.90</b>   | <b>3.05</b>       | <b>4.71</b>  | <b>7.69</b>   |
| <b>Meat and meat products</b>           | <b>3.09</b> | <b>3.49</b>   | <b>3.89</b>       | <b>3.07</b>  | <b>2.44</b>   |
| <i>Meat</i>                             | 1.64        | 1.61          | 1.83              | 1.64         | 1.45          |
| <i>Red meat</i>                         | 0.91        | 0.97          | 0.94              | 0.89         | 0.95          |
| <i>White meat</i>                       | 0.31        | 0.32          | 0.40              | 0.31         | 0.23          |
| <i>Poultry</i>                          | 0.41        | 0.33          | 0.49              | 0.44         | 0.27          |
| <i>Viscera and offal</i>                | 0.06        | 0.03          | -                 | 0.06         | 0.08          |
| <i>Sausages and other meat products</i> | 1.40        | 1.85          | 2.06              | 1.37         | 0.91          |
| <b>Milk and dairy products</b>          | <b>4.38</b> | <b>5.39</b>   | <b>5.10</b>       | <b>4.44</b>  | <b>3.70</b>   |
| <i>Milk</i>                             | 1.03        | 1.98          | 1.77              | 0.95         | 1.06          |
| <i>Whole milk</i>                       | 0.99        | 1.97          | 1.75              | 0.91         | 1.04          |
| <i>Semi skimmed milk</i>                | -           | -             | -                 | -            | -             |
| <i>Skimmed milk</i>                     | -           | -             | -                 | -            | -             |

| VITAMIN E                            | Total 9–75  | Children 9–12 | Adolescents 13–17 | Adults 18–64 | Elderly 65–75 |
|--------------------------------------|-------------|---------------|-------------------|--------------|---------------|
| (%)                                  | 2009        | 213           | 211               | 1655         | 206           |
| <i>Other dairy</i>                   | 0.04        | -             | 0.02              | 0.04         | 0.02          |
| <i>Yogurt and fermented milk</i>     | 0.61        | 0.60          | 0.47              | 0.62         | 0.79          |
| <i>Skimmed Fermented milk</i>        | -           | -             | -                 | -            | -             |
| <i>Whole fermented milk</i>          | 0.11        | 0.01          | 0.04              | 0.10         | 0.21          |
| <i>Skimmed milk yogurts</i>          | 0.02        | -             | 0.01              | 0.02         | 0.02          |
| <i>Whole milk yogurt</i>             | 0.49        | 0.58          | 0.43              | 0.50         | 0.56          |
| <i>Cheese</i>                        | 2.39        | 2.33          | 2.57              | 2.47         | 1.72          |
| <i>Other dairy products</i>          | 0.36        | 0.49          | 0.28              | 0.40         | 0.12          |
| <b>Non-alcoholic beverages</b>       | <b>2.68</b> | <b>5.53</b>   | <b>6.05</b>       | <b>2.46</b>  | <b>1.67</b>   |
| <i>Water</i>                         | -           | -             | -                 | -            | -             |
| <i>Coffee and herbal teas</i>        | -           | -             | -                 | -            | -             |
| <i>Sugared soft drinks</i>           | -           | -             | -                 | -            | -             |
| <i>Unsweetened soft drinks</i>       | -           | -             | -                 | -            | -             |
| <i>Sports drinks</i>                 | -           | -             | -                 | -            | -             |
| <i>Juices and nectars</i>            | 1.98        | 5.46          | 5.84              | 1.62         | 0.81          |
| <i>Energy drinks</i>                 | -           | -             | -                 | -            | -             |
| <i>Other non-alcoholic beverages</i> | 0.70        | 0.06          | 0.21              | 0.84         | 0.87          |

| VITAMIN E                                | Total 9–75   | Children 9–12 | Adolescents 13–17 | Adults 18–64 | Elderly 65–75 |
|------------------------------------------|--------------|---------------|-------------------|--------------|---------------|
| (%)                                      | 2009         | 213           | 211               | 1655         | 206           |
| <b>Oils and fats</b>                     | <b>45.66</b> | <b>47.92</b>  | <b>43.44</b>      | <b>45.83</b> | <b>43.36</b>  |
| <i>Olive oil</i>                         | 26.67        | 24.71         | 22.22             | 26.36        | 32.66         |
| <i>Other oils</i>                        | 16.77        | 20.73         | 19.34             | 17.30        | 7.78          |
| <i>Butter, margarine and shortening</i>  | 2.22         | 2.48          | 1.88              | 2.17         | 2.92          |
| <b>Pulses</b>                            | <b>1.72</b>  | <b>1.59</b>   | <b>1.48</b>       | <b>1.66</b>  | <b>1.90</b>   |
| <b>Sauces and condiments</b>             | <b>2.08</b>  | <b>1.74</b>   | <b>2.43</b>       | <b>2.21</b>  | <b>0.98</b>   |
| <b>Sugars and sweets</b>                 | <b>0.70</b>  | <b>1.66</b>   | <b>1.40</b>       | <b>0.66</b>  | <b>0.18</b>   |
| <i>Sugar</i>                             | -            | -             | -                 | -            | -             |
| <i>Chocolate</i>                         | 0.63         | 1.61          | 1.28              | 0.57         | 0.18          |
| <i>Jams and other</i>                    | -            | -             | -                 | -            | -             |
| <i>Other sweets</i>                      | 0.07         | 0.05          | 0.12              | 0.09         | -             |
| <b>Supplements and meal replacements</b> | <b>0.18</b>  | <b>0.21</b>   | <b>-</b>          | <b>0.22</b>  | <b>-</b>      |
| <b>Ready-to-eat-meals</b>                | <b>4.44</b>  | <b>5.74</b>   | <b>7.22</b>       | <b>4.29</b>  | <b>2.45</b>   |
| <b>Vegetables</b>                        | <b>11.42</b> | <b>6.41</b>   | <b>7.44</b>       | <b>11.48</b> | <b>15.06</b>  |

**Table S14. Dietary sources of vitamin C (%) from food groups/subgroups by sex and age groups in the ANIBES Spanish population.**

| VITAMIN C                                | Total 9–75  | Children 9–12 | Adolescents 13–17 | Adults 18–64 | Elderly 65–75 |
|------------------------------------------|-------------|---------------|-------------------|--------------|---------------|
| (%)                                      | 2009        | 213           | 211               | 1655         | 206           |
| <b>Alcoholic beverages</b>               | <b>0.06</b> | <b>-</b>      | <b>-</b>          | <b>0.06</b>  | <b>0.03</b>   |
| <i>High alcohol content beverages</i>    | -           | -             | -                 | -            | -             |
| <i>Low alcohol content beverages</i>     | 0.06        | -             | -                 | 0.06         | 0.03          |
| <b>Appetizers</b>                        | <b>0.30</b> | <b>0.41</b>   | <b>0.57</b>       | <b>0.30</b>  | <b>0.04</b>   |
| <b>Cereals/Grains</b>                    | <b>0.88</b> | <b>0.69</b>   | <b>0.15</b>       | <b>0.99</b>  | <b>0.90</b>   |
| <i>Grains and flours</i>                 | 0.02        | 0.02          | 0.01              | 0.02         | 0.01          |
| <i>Breakfast cereals and cereal bars</i> | 0.86        | 0.67          | 0.14              | 0.96         | 0.89          |
| <i>Bread</i>                             | -           | -             | -                 | -            | -             |
| <i>White bread</i>                       | -           | -             | -                 | -            | -             |
| <i>Brown bread</i>                       | -           | -             | -                 | -            | -             |
| <i>Others breads</i>                     | -           | -             | -                 | -            | -             |
| <i>Pasta</i>                             | -           | -             | -                 | -            | -             |
| <i>Bakery and pastry</i>                 | -           | -             | -                 | -            | -             |
| <b>Eggs</b>                              | <b>-</b>    | <b>-</b>      | <b>-</b>          | <b>-</b>     | <b>-</b>      |
| <b>Fish</b>                              | <b>0.08</b> | <b>0.14</b>   | <b>0.07</b>       | <b>0.07</b>  | <b>0.13</b>   |



| VITAMIN C                               | Total 9–75   | Children 9–12 | Adolescents 13–17 | Adults 18–64 | Elderly 65–75 |
|-----------------------------------------|--------------|---------------|-------------------|--------------|---------------|
| (%)                                     | 2009         | 213           | 211               | 1655         | 206           |
| <i>White fish</i>                       | 0.07         | 0.11          | 0.07              | 0.06         | 0.13          |
| <i>Oily fish</i>                        | -            | -             | -                 | -            | -             |
| <i>Shellfish</i>                        | 0.01         | 0.03          | -                 | 0.01         | -             |
| <i>Canned fish</i>                      | -            | -             | -                 | -            | -             |
| <b>Fruits</b>                           | <b>20.03</b> | <b>15.24</b>  | <b>12.77</b>      | <b>19.41</b> | <b>30.81</b>  |
| <b>Meat and meat products</b>           | <b>0.78</b>  | <b>0.40</b>   | <b>0.60</b>       | <b>0.86</b>  | <b>0.45</b>   |
| <i>Meat</i>                             | 0.54         | 0.35          | 0.60              | 0.58         | 0.21          |
| <i>Red meat</i>                         | 0.06         | 0.05          | 0.06              | 0.06         | 0.06          |
| <i>White meat</i>                       | 0.47         | 0.30          | 0.54              | 0.52         | 0.16          |
| <i>Poultry</i>                          | -            | -             | -                 | 0.01         | -             |
| <i>Viscera and offal</i>                | 0.25         | 0.05          | -                 | 0.27         | 0.24          |
| <i>Sausages and other meat products</i> | -            | -             | -                 | -            | -             |
| <b>Milk and dairy products</b>          | <b>8.93</b>  | <b>14.70</b>  | <b>13.29</b>      | <b>8.59</b>  | <b>6.46</b>   |
| <i>Milk</i>                             | 7.52         | 12.42         | 11.65             | 7.21         | 5.24          |
| <i>Whole milk</i>                       | 2.74         | 5.82          | 5.61              | 2.52         | 2.00          |
| <i>Semi skimmed milk</i>                | 3.53         | 5.59          | 4.63              | 3.38         | 2.24          |
| <i>Skimmed milk</i>                     | 1.20         | 0.93          | 1.40              | 1.26         | 0.97          |

| VITAMIN C                            | Total 9–75  | Children 9–12 | Adolescents 13–17 | Adults 18–64 | Elderly 65–75 |
|--------------------------------------|-------------|---------------|-------------------|--------------|---------------|
| (%)                                  | 2009        | 213           | 211               | 1655         | 206           |
| <i>Other dairy</i>                   | 0.05        | 0.08          | 0.01              | 0.05         | 0.03          |
| <i>Yogurt and fermented milk</i>     | 0.94        | 1.03          | 0.64              | 0.93         | 1.13          |
| <i>Skimmed Fermented milk</i>        | -           | -             | -                 | -            | -             |
| <i>Whole fermented milk</i>          | 0.09        | 0.02          | 0.02              | 0.08         | 0.24          |
| <i>Skimmed milk yogurts</i>          | 0.30        | 0.04          | 0.16              | 0.32         | 0.22          |
| <i>Whole milk yogurt</i>             | 0.55        | 0.96          | 0.46              | 0.53         | 0.67          |
| <i>Cheese</i>                        | 0.01        | 0.01          | 0.01              | 0.02         | 0.01          |
| <i>Other dairy products</i>          | 0.45        | 1.25          | 1.00              | 0.43         | 0.08          |
| <b>Non-alcoholic beverages</b>       | <b>8.56</b> | <b>15.64</b>  | <b>12.68</b>      | <b>8.58</b>  | <b>5.24</b>   |
| <i>Water</i>                         | -           | -             | -                 | -            | -             |
| <i>Coffee and herbal teas</i>        | -           | -             | -                 | -            | -             |
| <i>Sugared soft drinks</i>           | -           | -             | -                 | -            | -             |
| <i>Unsweetened soft drinks</i>       | -           | -             | -                 | -            | -             |
| <i>Sports drinks</i>                 | 0.47        | 0.99          | 0.39              | 0.57         | 0.07          |
| <i>Juices and nectars</i>            | 8.07        | 14.66         | 12.29             | 7.99         | 5.18          |
| <i>Energy drinks</i>                 | -           | -             | -                 | -            | -             |
| <i>Other non-alcoholic beverages</i> | 0.02        | -             | -                 | 0.02         | -             |

| VITAMIN C                                | Total 9–75 | Children 9–12 | Adolescents 13–17 | Adults 18–64 | Elderly 65–75 |
|------------------------------------------|------------|---------------|-------------------|--------------|---------------|
| (%)                                      | 2009       | 213           | 211               | 1655         | 206           |
| <b>Oils and fats</b>                     | -          | -             | -                 | -            | -             |
| <i>Olive oil</i>                         | -          | -             | -                 | -            | -             |
| <i>Other oils</i>                        | -          | -             | -                 | -            | -             |
| <i>Butter, margarine and shortening</i>  | -          | -             | -                 | -            | -             |
| <b>Pulses</b>                            | 1.50       | 1.40          | 1.43              | 1.55         | 1.04          |
| <b>Sauces and condiments</b>             | 3.03       | 4.27          | 4.74              | 3.13         | 0.84          |
| <b>Sugars and sweets</b>                 | 0.27       | 0.31          | 0.22              | 0.27         | 0.31          |
| <i>Sugar</i>                             | -          | -             | -                 | -            | -             |
| <i>Chocolate</i>                         | -          | -             | -                 | -            | -             |
| <i>Jams and other</i>                    | 0.27       | 0.31          | 0.22              | 0.27         | 0.31          |
| <i>Other sweets</i>                      | -          | -             | -                 | -            | -             |
| <b>Supplements and meal replacements</b> | 0.14       | 0.33          | -                 | 0.17         | 0.08          |
| <b>Ready-to-eat-meals</b>                | 4.88       | 6.54          | 8.40              | 4.60         | 3.08          |
| <b>Vegetables</b>                        | 50.56      | 39.93         | 45.06             | 51.43        | 50.57         |
